# Supplementary material for: Transplanting Rac1-silenced bone marrow mesenchymal stem cells promote neurological function recovery in TBI mice
Source: publisher site journal article supplement (doi:10.18632/aging.202334), 2020-12-19
Supplement: Supplementary file [file aging-v13i2-202334-supplementary-material-SD2.pdf]

## SUPPLEMENTARY TABLES

**Supplementary Table 1. Primer sequence of inserted fragment aiming at target genes.**

| Identifier             | Sequence                                                                                                     |
|------------------------|--------------------------------------------------------------------------------------------------------------|
| shRNA forward primer   | 5'-TGAAC TCGAGAAGGTATATTGCTGTTGACAGTGAGCG-3'                                                                 |
| shRNA reverse primer   | 5'-TCTCGAATTCTAGCCCCTTGAAGTCCGAGGCAGTAGGC-3'                                                                 |
| Template Rac1 shRNA 1  | 5'-TGCTGTTGACAGTGAGCGACAAGTTTTTGTACAGATTAATAGTGAAGCCAC<br>AGATGTATTAATCTGTAACAAAACTTGGTGCCTACTGCCTCGGA-3'    |
| Template Rac1 shRNA 2  | 5'-TGCTGTTGACAGTGAGCGCCAGACAGTATTTTACTAATATAGTGAAGCCAC<br>AGATGTATATTAGTCAAATACTGTCTGTTGCCTACTGCCTCGGA-3'    |
| Template P22 shRNA 1   | 5'-TGCTGTTGACAGTGAGCGTGGAGCGGTGTGGACAGAAGTATAGTGAAGCCA<br>CAGATGTATACTTCTGTCCACATCGCTCCATGCCTACTGCCTCGGA-3'  |
| Template P22 shRNA 2   | 5'-TGCTGTTGACAGTGAGCGTGGTGTATGCCACTGTAATAAATAGTGAAGCCAC<br>AGATGTATTTATTACAGTGAGCAACACCATGCCTACTGCCTCGGA-3'  |
| Template P47 shRNA 1   | 5'-TGCTGTTGACAGTGAGCGACGAGATCTACGAGTTCATAATAGTGAAGCCACA<br>GATGTATTATGGAAC TCGTAGATCTCGGTGCCTACTGCCTCGGA-3'  |
| Template P47 shRNA 2   | 5'-TGCTGTTGACAGTGAGCGCACGCAGGTGAACCGTATGTAATAGTGAAGCCACA<br>GATGTATTACATACGGTTCACCTGCGTATGCCTACTGCCTCGGA-3'  |
| Template P67 shRNA 1   | 5'-TGCTGTTGACAGTGAGCGCTCGGAACATGGTGTCTAAGAATAGTGAAGCCACA<br>GATGTATTCTTAGACACCATGTTCCGAATGCCTACTGCCTCGGA-3'  |
| Template P67 shRNA 2   | 5'-TGCTGTTGACAGTGAGCGTCAGGAAGATACCTCCCTGGAATAGTGAAGCCACA<br>GATGTATTCTGGAGAGGTATCTTCCCTGGTGCCTACTGCCTCGGA-3' |
| Template Vegfa shRNA 1 | 5'-TGCTGTTGACAGTGAGCGCTAGAGAATTCTACATACTAAATAGTGAAGCCACA<br>GATGTATTTAGTATGTAGAATTCTCTATTGCCTACTGCCTCGGA-3'  |
| Template Vegfa shRNA 2 | 5'-TGCTGTTGACAGTGAGCGACAACCTTGTGTTTGTATATAAATAGTGAAGCCACA<br>GATGTATTTATATACAAACACAAGTTGCTGCCTACTGCCTCGGA-3' |
| Template Ctgf shRNA 1  | 5'-TGCTGTTGACAGTGAGCGCACAGTTATCTAAGTTAATTTATAGTGAAGCCACA<br>GATGTATAAATTAAC TTAGATAACTGTATGCCTACTGCCTCGGA-3' |
| Template Ctgf shRNA 2  | 5'-TGCTGTTGACAGTGAGCGAACCTTTCTAGTTGAAAATAAATAGTGAAGCCACA<br>GATGTATTTATTTTCAACTAGAAAGGTGTGCCTACTGCCTCGGA-3'  |
| Template Mmp2 shRNA 1  | 5'-TGCTGTTGACAGTGAGCGATGGTGAGATCTTCTTCTTCAATAGTGAAGCCACA<br>GATGTATTGAAGAAGAAGATCTCACCACTGCCTACTGCCTCGGA-3'  |
| Template Mmp2 shRNA 2  | 5'-TGCTGTTGACAGTGAGCGAACCTGGTACTTCAGATTTAATAGTGAAGCCACA<br>GATGTATTAATCTGAAGTCACCAGGTGTGCCTACTGCCTCGGA-3'    |
| Template Ccl2 shRNA 1  | 5'-TGCTGTTGACAGTGAGCGCTCCAAGGTATTGTTTAAAATATAGTGAAGCCACA<br>GATGTATATTTTAAACAATACCTTGAATGCCTACTGCCTCGGA-3'   |
| Template Ccl2 shRNA 2  | 5'-TGCTGTTGACAGTGAGCGCACCACTCAAGCACTTCTGTATAGTGAAGCCACA<br>GATGTATACAGAAGTGCTTGAGGTGGTTTGCCTACTGCCTCGGA-3'   |
| Template Tgfb2 shRNA 1 | 5'-TGCTGTTGACAGTGAGCGAAAGCTTGTGTTCTGTTTGTATAGTGAAGCCACAG<br>ATGTATAACAAACAGAACACAAGCTTGTGCCTACTGCCTCGGA-3'   |
| Template Tgfb2 shRNA 2 | 5'-TGCTGTTGACAGTGAGCGCAGCTTGTGTTCTGTTTGTTAATAGTGAAGCCACAG<br>ATGTATTAACAAACAGAACACAAGCTTGTGCCTACTGCCTCGGA-3' |
| Template Tgfb3 shRNA 1 | 5'-TGCTGTTGACAGTGAGCGCCAGAATCTTTGTATAAATAAATAGTGAAGCCACA<br>GATGTATTTATTTATACAAAGATTCTGATGCCTACTGCCTCGGA-3'  |
| Template Tgfb3 shRNA 2 | 5'-TGCTGTTGACAGTGAGCGACACGGTGTGACTATAACAATAGTGAAGCCACA<br>GATGTATTGTATAGTCCAAGCACCGTGTGCCTACTGCCTCGGA-3'     |
| Template Edn1 shRNA 1  | 5'-TGCTGTTGACAGTGAGCGCACCGAGCACATTGACTACAGATAGTGAAGCCACA                                                     |

|                        |                                                                                                              |
|------------------------|--------------------------------------------------------------------------------------------------------------|
|                        | GATGTATCTGTAGTCAATGTGCTCGGTTTGCCTACTGCCTCGGA-3'                                                              |
| Template Edn1 shRNA 2  | 5'-TGCTGTTGACAGTGAGCGGCCAAAGTACCATGCAGAAAGTAGTGAAGCCAC<br>AGATGTATTTTCTGCATGGTACTTTGGGCTGCCTACTGCCTCGGA-3'   |
| Template GAS6 shRNA 1  | 5'-TGCTGTTGACAGTGAGCGACCGTGATTAGACTACGCTTCATAGTGAAGCCACA<br>GATGTATGAAGCGTAGTCTAATCACGGGTGCCTACTGCCTCGGA-3'  |
| Template GAS6 shRNA 2  | 5'-TGCTGTTGACAGTGAGCGACCACTCCACAAAGAAGCTCAATAGTGAAGCCAC<br>AGATGTATTGAGCTTCTTTGTAGAGTGGTTGCCTACTGCCTCGGA-3'  |
| Template CXCL1 shRNA 1 | 5'-TGCTGTTGACAGTGAGCGCTCAAAGGACTGTTACAAATGATAGTGAAGCCACA<br>GATGTATCATTGTAACAGTCCTTTGAATGCCTACTGCCTCGGA-3'   |
| Template CXCL1 shRNA 2 | 5'-TGCTGTTGACAGTGAGCGCAGGACTGTTACAAATGAAATATAGTGAAGCCACA<br>GATGTATACTTCATTGTAACAGTCCTTTGCCTACTGCCTCGGA-3'   |
| Template Thbs1 shRNA 1 | 5'-TGCTGTTGACAGTGAGCGAACCCTATCTATGACAAAACCTATAGTGAAGCCACA<br>GATGTATAGGTTTTGTCATAGATGGGTCTGCCTACTGCCTCGGA-3' |
| Template Thbs1 shRNA 2 | 5'-TGCTGTTGACAGTGAGCGCTACGAGTGCCGAGACTCCTAATAGTGAAGCCACA<br>GATGTATTAGGAATCTCGACACTCGTATTGCCTACTGCCTCGGA-3'  |

---

Note: Sense shRNA and antisense shRNA sequences are underlined.

**Supplementary Table 2. Primer sequence of target genes for qPCR experiments.**

| <b>Gene symbol</b> | <b>Forward primer sequence</b> | <b>Reverse primer sequence</b>   |
|--------------------|--------------------------------|----------------------------------|
| Rac1               | 5'-ACATCCCCACCGTCTTTGAC-3'     | 5'-ACCACATGTGTCTCCAAGTGT-3'      |
| P22                | 5'-CCTCCACTTACTGCTGTCCG-3'     | 5'-AATGGGAGTCCACTGCTCAC-3'       |
| P47                | 5'-AGAAACGCTTCGTCCCCAG-3'      | 5'-TCCTTTAACATTTTATGGAAGTCTGT-3' |
| P67                | 5'-CTGAGCAGGCCTTCACCAA-3'      | 5'-GCCTTCCTACCCACAGAAGC-3'       |
| Vegfa              | 5'-TGGAGCGTATGTGACAAGCC-3'     | 5'-TTCTGTGACGGTGACGATG-3'        |
| Ctgf               | 5'-CCCTAGCTGCCTACCGACT-3'      | 5'-TTGGTAACCCGGTGGAGAT-3'        |
| Mmp2               | 5'-TCCCCACGAAGCCTTGTTA-3'      | 5'-TCATAATCCTCGGTGGTGCC-3'       |
| Ccl2               | 5'-AGAAACCAGCCAACTCTCACT-3'    | 5'-GCATTAAGTGCATCTGGCTGAG-3'     |
| Tgfb2              | 5'-CTCTGTGGGTACCTTGATGCC-3'    | 5'-GCAAGCGAAAGACCCTGAAC-3'       |
| Tgfb3              | 5'-ACACAGCGCAGTGAGTTCAT-3'     | 5'-TGTGTGAACCCAGGAACGAG-3'       |
| Edn1               | 5'-AGCCCTTCTAGGTCTAAGCGA-3'    | 5'-CATGGTACTTTGGGCTCGGA-3'       |
| GAS6               | 5'-GGATGGTACCAAGGGCCAGA-3'     | 5'-AGTCACTTGTACATCTGGCAGG-3'     |
| CXCL1              | 5'-CCGAAGTCATAGCCCACTCA-3'     | 5'-ACGCCATCGGTGCAATCTAT-3'       |
| Thbs1              | 5'-CGAGTCGCAAAGGGAGATGT-3'     | 5'-ACGTTGGTTGAACTGGAGCA-3'       |
| GAPDH              | 5'-GACATGCCGCTGGAGAAAC-3'      | 5'-AGCCCAGGATGCCCTTTAGT-3'       |
